# Supplementary material for: Clinical outcome is significantly better with spheroid-based autologous chondrocyte implantation manufactured with more stringent cell culture criteria
Source: PubMed Central journal article supplement — Osteoarthr Cartil Open. 2020 Feb 4;2(1):100033. doi: 10.1016/j.ocarto.2020.100033 (PMC9718150; doi:10.1016/j.ocarto.2020.100033), 2020-02-04
Supplement: mmc1.pdf [file mmc1.pdf]

Supplementary Table S1: Defining the operational ranges of the manufacturing process using the non-responder rate in relation to cell cultivation time. Patient IDs in red, marked with 'N' correspond to non-responder patients (KOOS<8)

| Patient ID       | R/N | PO (days)   | non-responder (%) |       |
|------------------|-----|-------------|-------------------|-------|
| All patients:    |     | <b>7-28</b> | 31.7%             |       |
| Patients new OR: |     | <b>≤16</b>  | 28%               |       |
| 2253             | N   | 28          | } 80%             |       |
| 2205             | R   | 20          |                   |       |
| 2207             | N   | 20          |                   |       |
| 2427             | N   | 20          |                   |       |
| 2204             | N   | 19          |                   |       |
| 1101             | N   | 18          | } 61.5%           |       |
| 2277             | R   | 18          |                   |       |
| 1113             | N   | 17          |                   |       |
| 1305             | N   | 17          |                   | } 50% |
| 1804             | R   | 17          |                   |       |
| 2220             | N   | 17          | }                 |       |
| 2434             | R   | 17          |                   |       |
| 2440             | R   | 17          |                   |       |
| 2103             | R   | 16          |                   |       |
| 1322             | R   | 15          |                   |       |
| 2104             | R   | 15          |                   |       |
| 2417             | N   | 15          |                   |       |
| 1104             | N   | 14          |                   |       |
| 1321             | N   | 14          |                   |       |
| 2102             | N   | 14          |                   |       |
| 2216             | R   | 14          |                   |       |
| 2217             | N   | 14          |                   |       |
| 2219             | R   | 14          |                   |       |
| 2223             | R   | 14          |                   |       |
| 2286             | R   | 14          |                   |       |
| 2294             | R   | 14          |                   |       |
| 2301             | R   | 14          |                   |       |
| 2418             | R   | 14          |                   |       |
| 2420             | R   | 14          |                   |       |
| 2423             | N   | 14          |                   |       |
| 2431             | N   | 14          |                   |       |
| 1102             | R   | 13          |                   |       |
| 1114             | R   | 13          |                   |       |
| 1201             | R   | 13          |                   |       |

| Patient ID       | R/N | P0 (days) | non-responder (%) |
|------------------|-----|-----------|-------------------|
| All patients:    |     | 7-28      | 31.7%             |
| Patients new OR: |     | ≤16       | 28%               |
| 1205             | N   | 13        |                   |
| 1802             | R   | 13        |                   |
| 1808             | R   | 13        |                   |
| 2231             | R   | 13        |                   |
| 2235             | N   | 13        |                   |
| 2246             | N   | 13        |                   |
| 2265             | N   | 13        |                   |
| 2283             | N   | 13        |                   |
| 2412             | N   | 13        |                   |
| 2435             | R   | 13        |                   |
| 2441             | R   | 13        |                   |
| 2601             | R   | 13        |                   |
| 2709             | R   | 13        |                   |
| 1118             | R   | 12        |                   |
| 1120             | R   | 12        |                   |
| 1311             | N   | 12        |                   |
| 1603             | R   | 12        |                   |
| 1607             | N   | 12        |                   |
| 1609             | N   | 12        |                   |
| 1702             | N   | 12        |                   |
| 1707             | R   | 12        |                   |
| 2251             | R   | 12        |                   |
| 2275             | N   | 12        |                   |
| 2409             | R   | 12        |                   |
| 2410             | R   | 12        |                   |
| 2411             | N   | 12        |                   |
| 2439             | R   | 12        |                   |
| 2805             | N   | 12        |                   |
| 1105             | R   | 11        |                   |
| 1107             | R   | 11        |                   |
| 1108             | R   | 11        |                   |
| 1116             | N   | 11        |                   |
| 1122             | R   | 11        |                   |
| 1126             | R   | 11        |                   |
| 1207             | N   | 11        |                   |
| 1304             | R   | 11        |                   |
| 1306             | N   | 11        |                   |
| 1309             | R   | 11        |                   |
| 1310             | N   | 11        |                   |

| Patient ID       | R/N | PO (days)   | non-responder (%) |
|------------------|-----|-------------|-------------------|
| All patients:    |     | <b>7-28</b> | 31.7%             |
| Patients new OR: |     | <b>≤16</b>  | 28%               |
| 2201             | R   | 11          |                   |
| 2203             | R   | 11          |                   |
| 2209             | R   | 11          |                   |
| 2221             | R   | 11          |                   |
| 2222             | R   | 11          |                   |
| 2224             | R   | 11          |                   |
| 2226             | R   | 11          |                   |
| 2244             | N   | 11          |                   |
| 2254             | R   | 11          |                   |
| 2255             | R   | 11          |                   |
| 2257             | R   | 11          |                   |
| 2263             | R   | 11          |                   |
| 2269             | N   | 11          |                   |
| 2402             | R   | 11          |                   |
| 2408             | R   | 11          |                   |
| 2424             | R   | 11          |                   |
| 2701             | N   | 11          |                   |
| 1106             | R   | 10          |                   |
| 1109             | R   | 10          |                   |
| 1117             | R   | 10          |                   |
| 1301             | R   | 10          |                   |
| 1312             | R   | 10          |                   |
| 1602             | R   | 10          |                   |
| 1803             | R   | 10          |                   |
| 2202             | R   | 10          |                   |
| 2229             | R   | 10          |                   |
| 2238             | R   | 10          |                   |
| 2239             | R   | 10          |                   |
| 2240             | R   | 10          |                   |
| 2241             | R   | 10          |                   |
| 2248             | R   | 10          |                   |
| 2249             | R   | 10          |                   |
| 2252             | R   | 10          |                   |
| 2260             | N   | 10          |                   |
| 2261             | R   | 10          |                   |
| 2273             | R   | 10          |                   |
| 2284             | R   | 10          |                   |
| 2287             | R   | 10          |                   |
| 2413             | N   | 10          |                   |

| Patient ID          | R/N | PO (days)   | non-responder (%) |
|---------------------|-----|-------------|-------------------|
| All patients:       |     | <b>7-28</b> | 31.7%             |
| Patients new<br>OR: |     | <b>≤16</b>  | 28%               |
| 1112                | R   | 9           |                   |
| 1123                | R   | 9           |                   |
| 1204                | R   | 9           |                   |
| 2407                | N   | 9           |                   |
| 1307                | R   | 8           |                   |
| 2706                | R   | 8           |                   |
| 2256                | R   | 7           |                   |
| 2259                | R   | 7           |                   |

R: responder. N: non-responder. OR: operational ranges.

Supplementary Table S2: Defining the operational ranges of the manufacturing process using the non-responder rate in relation to spheroid cultivation time. Patient IDs in red, marked with 'N' correspond to non-responder patients (KOOS<8).

| Patient ID       | R/N | 3D cultivation time (days) | non-responder (%) |
|------------------|-----|----------------------------|-------------------|
| All patients:    |     | 15-42                      | 31.7%             |
| Patients new OR: |     | ≤28                        | 26.6%             |
| 1201             | R   | 42                         | }                 |
| 2269             | N   | 41                         |                   |
| 1207             | N   | 39                         | }                 |
| 1312             | R   | 39                         |                   |
| 1804             | R   | 38                         | }                 |
| 2235             | N   | 38                         |                   |
| 2248             | R   | 35                         | }                 |
| 2287             | R   | 35                         |                   |
| 2402             | R   | 35                         | }                 |
| 2221             | R   | 34                         |                   |
| 2407             | N   | 34                         | }                 |
| 2417             | N   | 33                         |                   |
| 2423             | N   | 33                         | }                 |
| 2246             | N   | 32                         |                   |
| 2253             | N   | 32                         | }                 |
| 2265             | N   | 32                         |                   |
| 2283             | N   | 32                         | }                 |
| 1107             | R   | 31                         |                   |
| 2104             | R   | 31                         | }                 |
| 2217             | N   | 31                         |                   |
| 2256             | R   | 31                         | }                 |
| 2263             | R   | 31                         |                   |
| 2434             | R   | 31                         | }                 |
| 1101             | N   | 30                         |                   |
| 2701             | N   | 30                         | }                 |
| 2418             | R   | 29                         |                   |
| 1120             | R   | 28                         | }                 |
| 1310             | N   | 28                         |                   |
| 2220             | N   | 28                         | }                 |
| 2229             | R   | 28                         |                   |
| 2238             | R   | 28                         | }                 |
| 2239             | R   | 28                         |                   |

|      |   |    |
|------|---|----|
| 2249 | R | 28 |
| 2273 | R | 28 |
| 2439 | R | 28 |
| 1102 | R | 27 |
| 1306 | N | 27 |
| 2224 | R | 27 |
| 2241 | R | 27 |
| 2251 | R | 27 |
| 2254 | R | 27 |
| 2257 | R | 27 |
| 2277 | R | 27 |
| 2441 | R | 27 |
| 2805 | N | 27 |
| 1113 | N | 26 |
| 1609 | N | 26 |
| 2240 | R | 26 |
| 2252 | R | 26 |
| 2408 | R | 26 |
| 1123 | R | 25 |
| 1205 | N | 25 |
| 2205 | R | 25 |
| 2207 | N | 25 |
| 2244 | N | 25 |
| 2260 | N | 25 |
| 2261 | R | 25 |
| 2420 | R | 25 |
| 2435 | R | 25 |
| 2440 | R | 25 |
| 1126 | R | 24 |
| 1307 | R | 24 |
| 1322 | R | 24 |
| 1808 | R | 24 |
| 2103 | R | 24 |
| 2223 | R | 24 |
| 2231 | R | 24 |
| 2259 | R | 24 |
| 2286 | R | 24 |
| 2294 | R | 24 |
| 2427 | N | 24 |
| 2706 | R | 24 |
| 1105 | R | 23 |
| 1108 | R | 23 |
| 1116 | N | 23 |
| 1122 | R | 23 |
| 1204 | R | 23 |
| 1309 | R | 23 |

|      |   |    |
|------|---|----|
| 2410 | R | 23 |
| 2424 | R | 23 |
| 1109 | R | 22 |
| 1112 | R | 22 |
| 1304 | R | 22 |
| 1305 | N | 22 |
| 1603 | R | 22 |
| 1607 | N | 22 |
| 2301 | R | 22 |
| 1114 | R | 21 |
| 1707 | R | 21 |
| 1802 | R | 21 |
| 2202 | R | 21 |
| 2204 | N | 21 |
| 2255 | R | 21 |
| 2275 | N | 21 |
| 2409 | R | 21 |
| 1106 | R | 20 |
| 1117 | R | 20 |
| 1311 | N | 20 |
| 1702 | N | 20 |
| 1803 | R | 20 |
| 2201 | R | 20 |
| 2203 | R | 20 |
| 2209 | R | 20 |
| 2222 | R | 20 |
| 2226 | R | 20 |
| 2284 | R | 20 |
| 2413 | N | 20 |
| 2431 | N | 20 |
| 2601 | R | 20 |
| 2709 | R | 20 |
| 1118 | R | 19 |
| 2102 | N | 19 |
| 2411 | N | 19 |
| 2412 | N | 19 |
| 1104 | N | 18 |
| 1321 | N | 18 |
| 2216 | R | 17 |
| 2219 | R | 17 |
| 1301 | R | 16 |
| 1602 | R | 15 |

R: responder. N: non-responder. OR: operational ranges.

Supplementary Table S3: Defining the operational ranges of the manufacturing process using the non-responder rate in relation to total cultivation time (monolayer and 3D). Patient IDs in red, marked with 'N' correspond to non-responder patients (KOOS<8).

| Patient ID       | R/N | ML+3D cultivation time (days) | non-responder (%) |
|------------------|-----|-------------------------------|-------------------|
| All patients:    |     | 39-76                         | 31.7%             |
| Patients new OR: |     | ≤55                           | 26%               |
| 1804             | R   | 76                            | } 50%             |
| 2253             | N   | 74                            |                   |
| 1201             | R   | 73                            |                   |
| 1312             | R   | 68                            |                   |
| 1207             | N   | 67                            |                   |
| 2235             | N   | 66                            |                   |
| 2269             | N   | 66                            |                   |
| 2434             | R   | 65                            |                   |
| 2417             | N   | 64                            |                   |
| 1101             | N   | 62                            |                   |
| 2423             | N   | 62                            |                   |
| 2104             | R   | 61                            |                   |
| 2402             | R   | 61                            |                   |
| 2418             | R   | 60                            |                   |
| 2217             | N   | 59                            |                   |
| 2220             | N   | 59                            |                   |
| 2221             | R   | 59                            |                   |
| 2246             | N   | 59                            |                   |
| 2248             | R   | 59                            |                   |
| 2263             | R   | 59                            |                   |
| 2265             | N   | 59                            |                   |
| 2277             | R   | 59                            |                   |
| 2283             | N   | 59                            |                   |
| 2287             | R   | 59                            |                   |
| 2427             | N   | 58                            |                   |
| 1107             | R   | 56                            |                   |
| 2407             | N   | 56                            |                   |
| 2440             | R   | 56                            |                   |
| 1120             | R   | 55                            |                   |
| 1322             | R   | 55                            |                   |
| 2701             | N   | 55                            |                   |
| 1102             | R   | 54                            |                   |

|      |   |    |
|------|---|----|
| 1310 | N | 54 |
| 2408 | R | 54 |
| 2420 | R | 54 |
| 2441 | R | 54 |
| 2805 | N | 54 |
| 1104 | N | 53 |
| 1113 | N | 53 |
| 1306 | N | 53 |
| 1808 | R | 53 |
| 2103 | R | 53 |
| 2251 | R | 53 |
| 2439 | R | 53 |
| 1205 | N | 52 |
| 2204 | N | 52 |
| 2205 | R | 52 |
| 2207 | N | 52 |
| 2223 | R | 52 |
| 2224 | R | 52 |
| 2229 | R | 52 |
| 2231 | R | 52 |
| 2238 | R | 52 |
| 2239 | R | 52 |
| 2240 | R | 52 |
| 2241 | R | 52 |
| 2244 | N | 52 |
| 2249 | R | 52 |
| 2252 | R | 52 |
| 2254 | R | 52 |
| 2256 | R | 52 |
| 2257 | R | 52 |
| 2273 | R | 52 |
| 2286 | R | 52 |
| 2294 | R | 52 |
| 2435 | R | 52 |
| 1126 | R | 49 |
| 1603 | R | 49 |
| 1609 | N | 49 |
| 1105 | R | 48 |
| 1108 | R | 48 |
| 1114 | R | 48 |
| 1116 | N | 48 |
| 1122 | R | 48 |
| 1309 | R | 48 |
| 1607 | N | 48 |
| 1802 | R | 48 |
| 1803 | R | 48 |

|      |   |    |
|------|---|----|
| 2410 | R | 48 |
| 2424 | R | 48 |
| 1112 | R | 47 |
| 1117 | R | 47 |
| 1118 | R | 47 |
| 1304 | R | 47 |
| 1311 | N | 47 |
| 1321 | N | 47 |
| 1707 | R | 47 |
| 2102 | N | 47 |
| 2409 | R | 47 |
| 2411 | N | 47 |
| 2431 | N | 47 |
| 2706 | R | 47 |
| 2709 | R | 47 |
| 1204 | R | 46 |
| 1305 | N | 46 |
| 1307 | R | 46 |
| 1702 | N | 46 |
| 2412 | N | 46 |
| 2601 | R | 46 |
| 1109 | R | 45 |
| 1123 | R | 45 |
| 2201 | R | 45 |
| 2202 | R | 45 |
| 2203 | R | 45 |
| 2209 | R | 45 |
| 2216 | R | 45 |
| 2219 | R | 45 |
| 2222 | R | 45 |
| 2226 | R | 45 |
| 2255 | R | 45 |
| 2259 | R | 45 |
| 2260 | N | 45 |
| 2261 | R | 45 |
| 2275 | N | 45 |
| 2284 | R | 44 |
| 2413 | N | 44 |
| 1106 | R | 43 |
| 1301 | R | 40 |
| 1602 | R | 40 |
| 2301 | R | 39 |

R: responder. N: non-responder. OR: operational ranges.
